# Supplementary material
Source: PubMed Central journal article supplement (PMC5718919)
Supplement: NIHMS906506-supplement-eTable.pdf [file NIHMS906506-supplement-eTable.pdf]

eTable 1. Risks (odds ratios) for any vs no gestational exposures (per month) for specific pesticide chemicals among women of preterm cases and term controls. Shown are adjusted odds ratios for chemicals where there were  $\geq 5$  cases exposed and for the exposure month closest to the time of delivery (e.g., for preterm cases 20-23 weeks at delivery the odds ratios shown are for month P5).

| Chemical Class                      | Chemical Name                  | Gestation Weeks at Delivery | Month of Exposure | Case Preterm (exp/not-exp) | Control Term (exp/not-exp) | Adjusted OR <sup>1</sup> (95%CI) |
|-------------------------------------|--------------------------------|-----------------------------|-------------------|----------------------------|----------------------------|----------------------------------|
| 2,4 - Dichlorophenoxy acid or ester | 2,4-D                          | 32-36                       | P8                | 15/22493                   | 116/197345                 | 1.09 (0.63-1.90)                 |
| 2,4 - Dichlorophenoxy acid or ester | 2,4-d, diethanolamine salt     | 24-27                       | P6                | 5/1787                     | 716/196745                 | 0.69 (0.26-1.85)                 |
| 2,4 - Dichlorophenoxy acid or ester | 2,4-d, diethanolamine salt     | 28-31                       | P7                | 5/3093                     | 685/196776                 | 0.53 (0.22-1.27)                 |
| 2,4 - Dichlorophenoxy acid or ester | 2,4-d, diethanolamine salt     | 32-36                       | P8                | 59/22449                   | 652/196809                 | 0.82 (0.62-1.07)                 |
| 2,4 - Dichlorophenoxy acid or ester | 2,4-d, dimethylamine salt      | 20-23                       | P5                | 11/504                     | 4225/193236                | 0.91 (0.47-1.76)                 |
| 2,4 - Dichlorophenoxy acid or ester | 2,4-d, dimethylamine salt      | 24-27                       | P6                | 22/1770                    | 4184/193277                | 0.61 (0.39-0.94)                 |
| 2,4 - Dichlorophenoxy acid or ester | 2,4-d, dimethylamine salt      | 28-31                       | P7                | 46/3052                    | 4138/193323                | 0.79 (0.59-1.05)                 |
| 2,4 - Dichlorophenoxy acid or ester | 2,4-d, dimethylamine salt      | 32-36                       | P8                | 397/22111                  | 4084/193377                | 0.88 (0.79-0.97)                 |
| 2,4 - Dichlorophenoxy acid or ester | 2,4-d, isopropyl ester         | 24-27                       | P6                | 8/1784                     | 1353/196108                | 0.68 (0.34-1.37)                 |
| 2,4 - Dichlorophenoxy acid or ester | 2,4-d, isopropyl ester         | 28-31                       | P7                | 18/3080                    | 1378/196083                | 0.82 (0.51-1.33)                 |
| 2,4 - Dichlorophenoxy acid or ester | 2,4-d, isopropyl ester         | 32-36                       | P8                | 166/22342                  | 1423/196038                | 1.04 (0.88-1.23)                 |
| 2,4 - Dichlorophenoxy acid or ester | 2,4-d, propyl ester            | 32-36                       | P8                | 31/22477                   | 280/197181                 | 1.00 (0.69-1.45)                 |
| 2,4 - Dichlorophenoxy acid or ester | 4-(2,4-db), dimethylamine salt | 32-36                       | P8                | 24/22484                   | 207/197254                 | 1.08 (0.71-1.65)                 |
| 2,6-Dinitroaniline                  | Ethalfuralin                   | 32-36                       | P8                | 11/22497                   | 104/197357                 | 0.98 (0.52-1.83)                 |
| 2,6-Dinitroaniline                  | Oryzalin                       | 20-23                       | P5                | 5/510                      | 3893/193568                | 0.56 (0.23-1.35)                 |
| 2,6-Dinitroaniline                  | Oryzalin                       | 24-27                       | P6                | 24/1768                    | 3726/193735                | 0.79 (0.53-1.19)                 |
| 2,6-Dinitroaniline                  | Oryzalin                       | 28-31                       | P7                | 50/3048                    | 3777/193684                | 0.90 (0.67-1.20)                 |
| 2,6-Dinitroaniline                  | Oryzalin                       | 32-36                       | P8                | 359/22149                  | 3607/193854                | 0.89 (0.80-1.00)                 |
| 2,6-Dinitroaniline                  | Pendimethalin                  | 20-23                       | P5                | 5/510                      | 2905/194556                | 0.73 (0.30-1.75)                 |

|                     |                     |       |    |           |             |                  |
|---------------------|---------------------|-------|----|-----------|-------------|------------------|
| 2,6-Dinitroaniline  | Pendimethalin       | 24-27 | P6 | 20/1772   | 2859/194602 | 0.80 (0.51-1.26) |
| 2,6-Dinitroaniline  | Pendimethalin       | 28-31 | P7 | 32/3066   | 2761/194700 | 0.78 (0.55-1.11) |
| 2,6-Dinitroaniline  | Pendimethalin       | 32-36 | P8 | 344/22164 | 2770/194691 | 1.13 (1.00-1.27) |
| 2,6-Dinitroaniline  | Trifluralin         | 20-23 | P5 | 7/508     | 2719/194742 | 0.90 (0.40-2.02) |
| 2,6-Dinitroaniline  | Trifluralin         | 24-27 | P6 | 27/1765   | 2631/194830 | 1.12 (0.75-1.66) |
| 2,6-Dinitroaniline  | Trifluralin         | 28-31 | P7 | 37/3061   | 2603/194858 | 0.93 (0.67-1.30) |
| 2,6-Dinitroaniline  | Trifluralin         | 32-36 | P8 | 265/22243 | 2657/194804 | 0.89 (0.78-1.01) |
| Alcohol/Ether       | Isopropyl alcohol   | 20-23 | P5 | 12/503    | 6441/191020 | 0.71 (0.39-1.30) |
| Alcohol/Ether       | Isopropyl alcohol   | 24-27 | P6 | 40/1752   | 6171/191290 | 0.72 (0.52-0.99) |
| Alcohol/Ether       | Isopropyl alcohol   | 28-31 | P7 | 80/3018   | 6110/191351 | 0.87 (0.69-1.09) |
| Alcohol/Ether       | Isopropyl alcohol   | 32-36 | P8 | 432/22076 | 6126/191335 | 0.63 (0.57-0.70) |
| Alcohol/Ether       | Sec-butyl alcohol   | 32-36 | P8 | 15/22493  | 304/197157  | 0.46 (0.27-0.77) |
| Aldehyde            | Metaldehyde         | 24-27 | P6 | 7/1785    | 521/196940  | 1.58 (0.75-3.35) |
| Aldehyde            | Metaldehyde         | 28-31 | P7 | 6/3092    | 509/196952  | 0.80 (0.36-1.80) |
| Aldehyde            | Metaldehyde         | 32-36 | P8 | 53/22455  | 478/196983  | 0.97 (0.72-1.29) |
| Alkyl phthlate      | Chlorthal-dimethyl  | 28-31 | P7 | 7/3091    | 306/197155  | 1.68 (0.79-3.57) |
| Alkyl phthlate      | Chlorthal-dimethyl  | 32-36 | P8 | 30/22478  | 302/197159  | 0.94 (0.64-1.38) |
| Alkyl Phthalate     | Diocetyl phthalate  | 32-36 | P8 | 11/22497  | 282/197179  | 0.33 (0.18-0.62) |
| Amide               | Dimethenamid-p      | 32-36 | P8 | 7/22501   | 23/197438   | 1.75 (0.60-5.10) |
| Amide               | Famoxadone          | 32-36 | P8 | 13/22495  | 71/197390   | 1.63 (0.90-2.96) |
| Amide               | Isoxaben            | 32-36 | P8 | 8/22500   | 130/197331  | 0.51 (0.24-1.09) |
| Amide               | Mandipropamid       | 32-36 | P8 | 16/22492  | 111/197350  | 1.14 (0.65-2.00) |
| Amide               | Napropamide         | 28-31 | P7 | 8/3090    | 538/196923  | 1.11 (0.55-2.24) |
| Amide               | Napropamide         | 32-36 | P8 | 32/22476  | 482/196979  | 0.61 (0.42-0.88) |
| Amide               | Propyzamide         | 28-31 | P7 | 7/3091    | 339/197122  | 1.57 (0.74-3.33) |
| Amide               | Propyzamide         | 32-36 | P8 | 31/22477  | 328/197133  | 0.92 (0.64-1.33) |
| Amide               | Saflufenacil        | 32-36 | P8 | 25/22483  | 205/197256  | 1.11 (0.72-1.70) |
| Amine               | Triethanolamine     | 28-31 | P7 | 7/3091    | 698/196763  | 0.67 (0.32-1.41) |
| Amine               | Triethanolamine     | 32-36 | P8 | 46/22462  | 679/196782  | 0.62 (0.46-0.83) |
| Anilide             | Boscalid            | 24-27 | P6 | 23/1769   | 2439/195022 | 1.05 (0.68-1.62) |
| Anilide             | Boscalid            | 28-31 | P7 | 31/3067   | 2386/195075 | 0.86 (0.60-1.24) |
| Anilide             | Boscalid            | 32-36 | P8 | 254/22254 | 2444/195017 | 0.92 (0.80-1.05) |
| Anilide             | Fenhexamid          | 24-27 | P6 | 5/1787    | 293/197168  | 1.80 (0.74-4.37) |
| Anilide             | Fenhexamid          | 32-36 | P8 | 36/22472  | 281/197180  | 1.14 (0.80-1.62) |
| Anthranilic diamide | Chlorantraniliprole | 24-27 | P6 | 6/1786    | 443/197018  | 1.63 (0.72-3.66) |
| Anthranilic diamide | Chlorantraniliprole | 28-31 | P7 | 9/3089    | 515/196946  | 1.30 (0.67-2.51) |
| Anthranilic diamide | Chlorantraniliprole | 32-36 | P8 | 89/22419  | 552/196909  | 1.48 (1.18-1.86) |

|                               |                                  |       |    |           |             |                  |
|-------------------------------|----------------------------------|-------|----|-----------|-------------|------------------|
| Anthranilic diamide           | Flubendiamide                    | 32-36 | P8 | 27/22481  | 189/197272  | 1.35 (0.90-2.03) |
| Antibiotic                    | Oxytetracycline, calcium complex | 32-36 | P8 | 9/22499   | 44/197417   | 1.78 (0.84-3.80) |
| Aryloxyphenoxy propionic acid | Fenoxaprop-p-ethyl               | 32-36 | P8 | 7/22501   | 26/197435   | 2.48 (1.07-5.75) |
| Aryloxyphenoxy propionic acid | Fluazifop-p-butyl                | 28-31 | P7 | 10/3088   | 248/197213  | 2.63 (1.35-5.14) |
| Aryloxyphenoxy propionic acid | Fluazifop-p-butyl                | 32-36 | P8 | 16/22492  | 251/197210  | 0.56 (0.33-0.95) |
| Avermectin                    | Abamectin                        | 20-23 | P5 | 11/504    | 4906/192555 | 0.86 (0.46-1.61) |
| Avermectin                    | Abamectin                        | 24-27 | P6 | 33/1759   | 5120/192341 | 0.77 (0.55-1.09) |
| Avermectin                    | Abamectin                        | 28-31 | P7 | 85/3013   | 5082/192379 | 1.14 (0.91-1.42) |
| Avermectin                    | Abamectin                        | 32-36 | P8 | 557/21951 | 5087/192374 | 0.97 (0.88-1.06) |
| Avermectin                    | Emamectin benzoate               | 28-31 | P7 | 6/3092    | 271/197190  | 1.51 (0.67-3.41) |
| Avermectin                    | Emamectin benzoate               | 32-36 | P8 | 32/22476  | 289/197172  | 1.02 (0.71-1.47) |
| Azole                         | Difenoconazole                   | 32-36 | P8 | 11/22497  | 98/197363   | 0.92 (0.48-1.76) |
| Azole                         | Fenbuconazole                    | 28-31 | P7 | 10/3088   | 656/196805  | 1.05 (0.56-1.97) |
| Azole                         | Fenbuconazole                    | 32-36 | P8 | 62/22446  | 635/196826  | 0.91 (0.70-1.19) |
| Azole                         | Metconazole                      | 32-36 | P8 | 10/22498  | 100/197361  | 0.95 (0.49-1.82) |
| Azole                         | Myclobutanil                     | 20-23 | P5 | 9/506     | 4887/192574 | 0.67 (0.33-1.35) |
| Azole                         | Myclobutanil                     | 24-27 | P6 | 23/1769   | 5096/192365 | 0.51 (0.33-0.78) |
| Azole                         | Myclobutanil                     | 28-31 | P7 | 66/3032   | 4810/192651 | 0.89 (0.69-1.15) |
| Azole                         | Myclobutanil                     | 32-36 | P8 | 495/22013 | 4753/192708 | 0.93 (0.85-1.03) |
| Azole                         | Paclbutrazol                     | 32-36 | P8 | 6/22502   | 88/197373   | 0.42 (0.16-1.16) |
| Azole                         | Propiconazole                    | 20-23 | P5 | 6/509     | 2767/194694 | 0.73 (0.30-1.77) |
| Azole                         | Propiconazole                    | 24-27 | P6 | 19/1773   | 2680/194781 | 0.80 (0.50-1.28) |
| Azole                         | Propiconazole                    | 28-31 | P7 | 38/3060   | 2588/194873 | 0.98 (0.71-1.37) |
| Azole                         | Propiconazole                    | 32-36 | P8 | 319/22189 | 2597/194864 | 1.11 (0.98-1.25) |
| Azole                         | Tebuconazole                     | 20-23 | P5 | 9/506     | 2604/194857 | 1.24 (0.61-2.50) |
| Azole                         | Tebuconazole                     | 24-27 | P6 | 20/1772   | 2588/194873 | 0.85 (0.54-1.34) |
| Azole                         | Tebuconazole                     | 28-31 | P7 | 34/3064   | 2500/194961 | 0.94 (0.67-1.33) |
| Azole                         | Tebuconazole                     | 32-36 | P8 | 277/22231 | 2556/194905 | 0.99 (0.87-1.12) |
| Azole                         | Triflumizole                     | 24-27 | P6 | 5/1787    | 694/196767  | 0.82 (0.34-1.99) |
| Azole                         | Triflumizole                     | 28-31 | P7 | 11/3087   | 706/196755  | 1.08 (0.59-1.96) |
| Azole                         | Triflumizole                     | 32-36 | P8 | 64/22444  | 702/196759  | 0.79 (0.61-1.03) |
| Benzoic acid                  | Benzoic acid                     | 28-31 | P7 | 7/3091    | 225/197236  | 2.24 (1.05-4.76) |
| Benzoic acid                  | Benzoic acid                     | 32-36 | P8 | 16/22492  | 210/197251  | 0.71 (0.43-1.19) |
| Benzoic acid                  | Dicamba, dimethylamine salt      | 28-31 | P7 | 12/3086   | 715/196746  | 1.14 (0.64-2.02) |

|                      |                                                  |       |    |           |             |                  |
|----------------------|--------------------------------------------------|-------|----|-----------|-------------|------------------|
| Benzoic acid         | Dicamba, dimethylamine salt                      | 32-36 | P8 | 63/22445  | 723/196738  | 0.79 (0.61-1.03) |
| Benzoic acid         | Dicamba, dimethylamine salt                      | 32-36 | P8 | 21/22487  | 198/197263  | 0.98 (0.62-1.54) |
| Benzoic acid         | Dicamba, sodium salt                             | 32-36 | P8 | 19/22489  | 218/197243  | 0.81 (0.50-1.29) |
| Benzoic acid         | Diglycolamine salt of 3,6-dichloro-o-anisic acid | 28-31 | P7 | 6/3092    | 597/196864  | 0.72 (0.32-1.60) |
| Benzoic acid         | Diglycolamine salt of 3,6-dichloro-o-anisic acid | 32-36 | P8 | 55/22453  | 573/196888  | 0.87 (0.66-1.15) |
| Benzimidazole        | Benomyl                                          | 28-31 | P7 | 9/3089    | 667/196794  | 0.80 (0.40-1.61) |
| Benzimidazole        | Benomyl                                          | 32-36 | P8 | 48/22460  | 646/196815  | 0.67 (0.50-0.90) |
| Bipyridylium         | Diquat dibromide                                 | 32-36 | P8 | 18/22490  | 168/197293  | 1.01 (0.62-1.64) |
| Bipyridylium         | Paraquat dichloride                              | 20-23 | P5 | 23/492    | 9654/187807 | 0.92 (0.59-1.42) |
| Bipyridylium         | Paraquat dichloride                              | 24-27 | P6 | 55/1737   | 9700/187761 | 0.64 (0.49-0.85) |
| Bipyridylium         | Paraquat dichloride                              | 28-31 | P7 | 118/2980  | 9664/187797 | 0.82 (0.68-1.00) |
| Bipyridylium         | Paraquat dichloride                              | 32-36 | P8 | 897/21611 | 9588/187873 | 0.84 (0.79-0.91) |
| Bis-Carbamate        | Desmedipham                                      | 32-36 | P8 | 5/22503   | 21/197440   | 2.03 (0.76-5.46) |
| Bis-Carbamate        | Phenmedipham                                     | 32-36 | P8 | 5/22503   | 52/197409   | 0.82 (0.33-2.07) |
| Botanical            | Gibberellins                                     | 20-23 | P5 | 6/509     | 3321/194140 | 0.73 (0.32-1.63) |
| Botanical            | Gibberellins                                     | 24-27 | P6 | 16/1776   | 3307/194154 | 0.52 (0.31-0.87) |
| Botanical            | Gibberellins                                     | 28-31 | P7 | 53/3045   | 3227/194234 | 1.07 (0.81-1.41) |
| Botanical            | Gibberellins                                     | 32-36 | P8 | 338/22170 | 3220/194241 | 0.93 (0.83-1.04) |
| Botanical            | N6-benzyl adenine                                | 32-36 | P8 | 5/22503   | 25/197436   | 1.84 (0.70-4.82) |
| Cellulose derivative | Methyl cellulose                                 | 32-36 | P8 | 6/22502   | 178/197283  | 0.31 (0.14-0.71) |
| Chelating agent      | EDTA, tetrasodium salt                           | 28-31 | P7 | 7/3091    | 700/196761  | 0.67 (0.32-1.41) |
| Chelating agent      | EDTA, tetrasodium salt                           | 32-36 | P8 | 46/22462  | 684/196777  | 0.61 (0.45-0.83) |
| Chloroacetanilide    | Metolachlor                                      | 32-36 | P8 | 20/22488  | 182/197279  | 0.99 (0.61-1.58) |
| Chloroacetanilide    | S-metolachlor                                    | 24-27 | P6 | 5/1787    | 769/196692  | 0.63 (0.24-1.70) |
| Chloroacetanilide    | S-metolachlor                                    | 28-31 | P7 | 11/3087   | 727/196734  | 0.94 (0.51-1.77) |
| Chloroacetanilide    | S-metolachlor                                    | 32-36 | P8 | 63/22445  | 715/196746  | 0.79 (0.61-1.02) |
| Copper compound      | Copper                                           | 24-27 | P6 | 5/1787    | 666/196795  | 0.88 (0.37-2.13) |
| Copper compound      | Copper                                           | 28-31 | P7 | 9/3089    | 706/196755  | 0.74 (0.37-1.49) |
| Copper compound      | Copper                                           | 32-36 | P8 | 111/22397 | 667/196794  | 1.50 (1.23-1.84) |
| Copper compound      | Copper hydroxide                                 | 20-23 | P5 | 15/500    | 8873/188588 | 0.71 (0.43-1.20) |
| Copper compound      | Copper hydroxide                                 | 24-27 | P6 | 59/1733   | 8677/188784 | 0.79 (0.61-1.03) |
| Copper compound      | Copper hydroxide                                 | 28-31 | P7 | 102/2996  | 8524/188937 | 0.80 (0.65-0.98) |
| Copper compound      | Copper hydroxide                                 | 32-36 | P8 | 833/21675 | 8591/188870 | 0.87 (0.81-0.93) |
| Copper compound      | Copper oxide                                     | 24-27 | P6 | 9/1783    | 1809/195652 | 0.52 (0.26-1.04) |
| Copper compound      | Copper oxide                                     | 28-31 | P7 | 22/3076   | 1810/195651 | 0.82 (0.53-1.26) |
| Copper compound      | Copper oxide                                     | 32-36 | P8 | 193/22315 | 1680/195781 | 1.04 (0.89-1.21) |

|                          |                                       |       |    |           |              |                  |
|--------------------------|---------------------------------------|-------|----|-----------|--------------|------------------|
| Copper compound          | Copper oxychloride                    | 32-36 | P8 | 41/22467  | 380/197081   | 0.98 (0.70-1.36) |
| Copper compound          | Copper oxychloride sulfate            | 24-27 | P6 | 5/1787    | 543/196918   | 1.06 (0.44-2.56) |
| Copper compound          | Copper oxychloride sulfate            | 28-31 | P7 | 9/3089    | 559/196902   | 0.85 (0.40-1.79) |
| Copper compound          | Copper oxychloride sulfate            | 32-36 | P8 | 43/22465  | 570/196891   | 0.68 (0.49-0.93) |
| Copper compound          | Copper salts of fatty and rosin acids | 32-36 | P8 | 6/22502   | 58/197403    | 0.99 (0.43-2.30) |
| Copper compound          | Copper sulfate                        | 20-23 | P5 | 5/510     | 1906/195555  | 1.07 (0.44-2.58) |
| Copper compound          | Copper sulfate                        | 24-27 | P6 | 12/1780   | 1920/195541  | 0.76 (0.43-1.34) |
| Copper compound          | Copper sulfate                        | 28-31 | P7 | 16/3082   | 1971/195490  | 0.56 (0.34-0.92) |
| Copper compound          | Copper sulfate                        | 32-36 | P8 | 218/22290 | 1960/195501  | 1.00 (0.87-1.15) |
| Copper compound          | Copper sulfate (pentahydrate)         | 32-36 | P8 | 30/22478  | 355/197106   | 0.67 (0.45-0.99) |
| Cyclohexenone derivative | Clethodim                             | 28-31 | P7 | 7/3091    | 671/196790   | 0.61 (0.27-1.37) |
| Cyclohexenone derivative | Clethodim                             | 32-36 | P8 | 59/22449  | 699/196762   | 0.71 (0.53-0.93) |
| Cyclohexenone derivative | Sethoxydim                            | 28-31 | P7 | 10/3088   | 685/196776   | 1.02 (0.55-1.91) |
| Cyclohexenone derivative | Sethoxydim                            | 32-36 | P8 | 64/22444  | 714/196747   | 0.81 (0.63-1.05) |
| Diacylhydrazine          | Methoxyfenozide                       | 24-27 | P6 | 16/1776   | 2177/195284  | 0.83 (0.50-1.38) |
| Diacylhydrazine          | Methoxyfenozide                       | 28-31 | P7 | 35/3063   | 2151/195310  | 1.14 (0.81-1.59) |
| Diacylhydrazine          | Methoxyfenozide                       | 32-36 | P8 | 287/22221 | 2218/195243  | 1.17 (1.03-1.33) |
| Diacylhydrazine          | Tebufenozide                          | 24-27 | P6 | 6/1786    | 758/196703   | 0.99 (0.44-2.22) |
| Diacylhydrazine          | Tebufenozide                          | 28-31 | P7 | 14/3084   | 789/196672   | 1.18 (0.68-2.04) |
| Diacylhydrazine          | Tebufenozide                          | 32-36 | P8 | 71/22437  | 740/196721   | 0.89 (0.70-1.14) |
| Dicarboximide            | Iprodione                             | 20-23 | P5 | 6/509     | 3994/193467  | 0.53 (0.22-1.29) |
| Dicarboximide            | Iprodione                             | 24-27 | P6 | 18/1774   | 4014/193447  | 0.48 (0.29-0.78) |
| Dicarboximide            | Iprodione                             | 28-31 | P7 | 43/3055   | 3804/193657  | 0.76 (0.56-1.04) |
| Dicarboximide            | Iprodione                             | 32-36 | P8 | 313/22195 | 3758/193703  | 0.72 (0.64-0.81) |
| Dicarboximide            | Vinclozolin                           | 32-36 | P8 | 6/22502   | 93/197368    | 0.40 (0.15-1.08) |
| Diphenyl ether           | Oxyfluorfen                           | 20-23 | P5 | 19/496    | 10674/186787 | 0.67 (0.41-1.09) |
| Diphenyl ether           | Oxyfluorfen                           | 24-27 | P6 | 66/1726   | 10610/186851 | 0.75 (0.59-0.96) |
| Diphenyl ether           | Oxyfluorfen                           | 28-31 | P7 | 127/2971  | 10605/186856 | 0.81 (0.67-0.97) |
| Diphenyl ether           | Oxyfluorfen                           | 32-36 | P8 | 996/21512 | 10666/186795 | 0.84 (0.79-0.90) |
| Dithiocarbamate-ETU      | Mancozeb                              | 24-27 | P6 | 10/1782   | 1265/196196  | 0.96 (0.51-1.80) |
| Dithiocarbamate-ETU      | Mancozeb                              | 28-31 | P7 | 24/3074   | 1226/196235  | 1.25 (0.82-1.91) |
| Dithiocarbamate-ETU      | Mancozeb                              | 32-36 | P8 | 130/22378 | 1285/196176  | 0.85 (0.70-1.03) |
| Dithiocarbamate-ETU      | Maneb                                 | 24-27 | P6 | 14/1778   | 1410/196051  | 1.14 (0.66-1.97) |
| Dithiocarbamate-ETU      | Maneb                                 | 28-31 | P7 | 13/3085   | 1335/196126  | 0.64 (0.36-1.14) |
| Dithiocarbamate-ETU      | Maneb                                 | 32-36 | P8 | 103/22405 | 1395/196066  | 0.66 (0.54-0.81) |
| Dithiocarbamate-ETU      | Ziram                                 | 20-23 | P5 | 9/506     | 2149/195312  | 1.77 (0.91-3.43) |

|                      |                                                |       |    |           |             |                  |
|----------------------|------------------------------------------------|-------|----|-----------|-------------|------------------|
| Dithiocarbamate-ETU  | Ziram                                          | 24-27 | P6 | 13/1779   | 2036/195425 | 0.65 (0.36-1.17) |
| Dithiocarbamate-ETU  | Ziram                                          | 28-31 | P7 | 19/3079   | 2031/195430 | 0.66 (0.42-1.03) |
| Dithiocarbamate-ETU  | Ziram                                          | 32-36 | P8 | 179/22329 | 1962/195499 | 0.83 (0.71-0.97) |
| Dithiocarbamate-MITC | Metam-sodium                                   | 28-31 | P7 | 11/3087   | 778/196683  | 0.95 (0.51-1.78) |
| Dithiocarbamate-MITC | Metam-sodium                                   | 32-36 | P8 | 75/22433  | 799/196662  | 0.82 (0.64-1.05) |
| Dithiocarbamate-MITC | Potassium N-methyldithiocarbamate              | 28-31 | P7 | 8/3090    | 357/197104  | 1.65 (0.82-3.34) |
| Dithiocarbamate-MITC | Potassium N-methyldithiocarbamate              | 32-36 | P8 | 33/22475  | 344/197117  | 0.89 (0.62-1.28) |
| Endothall            | Endothall, mono [N,N-dimethyl alkylamine] salt | 32-36 | P8 | 16/22492  | 216/197245  | 0.71 (0.42-1.18) |
| Glyco Ether          | Ethylene glycol, mono-butyl ether              | 32-36 | P8 | 18/22490  | 205/197256  | 0.81 (0.50-1.32) |
| Glycol               | Ethylene glycol                                | 28-31 | P7 | 6/3092    | 187/197274  | 1.94 (0.80-4.73) |
| Glycol               | Ethylene glycol                                | 32-36 | P8 | 16/22492  | 173/197288  | 0.87 (0.52-1.45) |
| Glycol               | Propylene glycol                               | 20-23 | P5 | 6/509     | 2378/195083 | 1.09 (0.48-2.44) |
| Glycol               | Propylene glycol                               | 24-27 | P6 | 17/1775   | 2379/195082 | 0.87 (0.54-1.40) |
| Glycol               | Propylene glycol                               | 28-31 | P7 | 37/3061   | 2350/195111 | 1.07 (0.77-1.49) |
| Glycol               | Propylene glycol                               | 32-36 | P8 | 154/22354 | 2492/194969 | 0.56 (0.48-0.66) |
| Halogenated organic  | 1,3-dichloropropene                            | 24-27 | P6 | 7/1785    | 863/196598  | 0.97 (0.46-2.05) |
| Halogenated organic  | 1,3-dichloropropene                            | 28-31 | P7 | 5/3093    | 803/196658  | 0.36 (0.13-0.95) |
| Halogenated organic  | 1,3-dichloropropene                            | 32-36 | P8 | 73/22435  | 792/196669  | 0.81 (0.63-1.03) |
| Halogenated organic  | Methyl bromide                                 | 24-27 | P6 | 5/1787    | 1305/196156 | 0.46 (0.19-1.12) |
| Halogenated organic  | Methyl bromide                                 | 28-31 | P7 | 12/3086   | 1295/196166 | 0.65 (0.37-1.16) |
| Halogenated organic  | Methyl bromide                                 | 32-36 | P8 | 93/22415  | 1229/196232 | 0.69 (0.55-0.85) |
| Hydroxybenzotrile    | Bromoxynil heptanoate                          | 28-31 | P7 | 9/3089    | 711/196750  | 0.91 (0.47-1.75) |
| Hydroxybenzotrile    | Bromoxynil heptanoate                          | 32-36 | P8 | 78/22430  | 617/196844  | 1.14 (0.89-1.45) |
| Hydroxybenzotrile    | Bromoxynil octanoate                           | 24-27 | P6 | 7/1785    | 1186/196275 | 0.72 (0.34-1.52) |
| Hydroxybenzotrile    | Bromoxynil octanoate                           | 28-31 | P7 | 11/3087   | 1209/196252 | 0.65 (0.36-1.18) |
| Hydroxybenzotrile    | Bromoxynil octanoate                           | 32-36 | P8 | 116/22392 | 1117/196344 | 0.93 (0.76-1.13) |
| Imidazole            | Fenamidone                                     | 32-36 | P8 | 6/22502   | 82/197379   | 0.56 (0.23-1.38) |
| Imidazolinone        | Imazamox, ammonium salt                        | 32-36 | P8 | 34/22474  | 285/197176  | 1.11 (0.78-1.59) |
| Imidazolinone        | Imazethapyr                                    | 32-36 | P8 | 22/22486  | 250/197211  | 0.81 (0.53-1.26) |
| Imidazolinone        | Imazethapyr, ammonium salt                     | 32-36 | P8 | 39/22469  | 233/197228  | 1.52 (1.08-2.15) |
| Inorganic            | Chloropicrin                                   | 24-27 | P6 | 6/1786    | 641/196820  | 1.11 (0.49-2.48) |
| Inorganic            | Chloropicrin                                   | 28-31 | P7 | 5/3093    | 628/196833  | 0.57 (0.23-1.37) |
| Inorganic            | Chloropicrin                                   | 32-36 | P8 | 61/22447  | 615/196846  | 0.90 (0.69-1.18) |
| Inorganic            | Hydrogen cyanamide                             | 32-36 | P8 | 31/22477  | 140/197321  | 2.04 (1.38-3.02) |

|                                  |                          |       |    |           |             |                  |
|----------------------------------|--------------------------|-------|----|-----------|-------------|------------------|
| Inorganic                        | Phosphoric acid          | 20-23 | P5 | 11/504    | 4388/193073 | 1.05 (0.58-1.92) |
| Inorganic                        | Phosphoric acid          | 24-27 | P6 | 18/1774   | 4387/193074 | 0.45 (0.28-0.73) |
| Inorganic                        | Phosphoric acid          | 28-31 | P7 | 58/3040   | 4331/193130 | 0.87 (0.67-1.14) |
| Inorganic                        | Phosphoric acid          | 32-36 | P8 | 318/22190 | 4283/193178 | 0.67 (0.60-0.76) |
| Inorganic                        | Sodium chlorate          | 32-36 | P8 | 55/22453  | 697/196764  | 0.73 (0.56-0.97) |
| Insect growth regulator (Chitin) | Buprofezin               | 28-31 | P7 | 11/3087   | 700/196761  | 0.89 (0.46-1.71) |
| Insect growth regulator (Chitin) | Buprofezin               | 32-36 | P8 | 90/22418  | 689/196772  | 1.17 (0.93-1.47) |
| Insect growth regulator (Chitin) | Cyromazine               | 32-36 | P8 | 10/22498  | 127/197334  | 0.72 (0.38-1.37) |
| Insect growth regulator (Chitin) | Diflubenzuron            | 28-31 | P7 | 5/3093    | 633/196828  | 0.58 (0.24-1.39) |
| Insect growth regulator (Chitin) | Diflubenzuron            | 32-36 | P8 | 66/22442  | 668/196793  | 0.87 (0.67-1.13) |
| Insect growth regulator (Chitin) | Novaluron                | 32-36 | P8 | 6/22502   | 32/197429   | 1.70 (0.71-4.06) |
| Juvenile hormone mimic           | Pyriproxyfen             | 20-23 | P5 | 7/508     | 1600/195861 | 1.49 (0.67-3.35) |
| Juvenile hormone mimic           | Pyriproxyfen             | 24-27 | P6 | 14/1778   | 1663/195798 | 1.00 (0.59-1.70) |
| Juvenile hormone mimic           | Pyriproxyfen             | 28-31 | P7 | 28/3070   | 1675/195786 | 1.15 (0.79-1.68) |
| Juvenile hormone mimic           | Pyriproxyfen             | 32-36 | P8 | 192/22316 | 1751/195710 | 0.98 (0.84-1.14) |
| Keto-enol                        | Spirodiclofen            | 24-27 | P6 | 6/1786    | 383/197078  | 1.93 (0.86-4.34) |
| Keto-enol                        | Spirodiclofen            | 28-31 | P7 | 8/3090    | 374/197087  | 1.56 (0.77-3.16) |
| Keto-enol                        | Spirodiclofen            | 32-36 | P8 | 68/22440  | 372/197089  | 1.64 (1.26-2.14) |
| Keto-enol                        | Spiromesifen             | 28-31 | P7 | 10/3088   | 750/196711  | 0.93 (0.50-1.75) |
| Keto-enol                        | Spiromesifen             | 32-36 | P8 | 106/22402 | 813/196648  | 1.14 (0.93-1.40) |
| Keto-enol                        | Spirotetramat            | 28-31 | P7 | 9/3089    | 331/197130  | 1.90 (0.98-3.70) |
| Keto-enol                        | Spirotetramat            | 32-36 | P8 | 64/22444  | 355/197106  | 1.74 (1.33-2.28) |
| Monochlorophenoxy acid or ester  | MCPA, dimethylamine salt | 24-27 | P6 | 11/1781   | 1480/195981 | 0.91 (0.50-1.66) |
| Monochlorophenoxy acid or ester  | MCPA, dimethylamine salt | 28-31 | P7 | 16/3082   | 1477/195984 | 0.78 (0.47-1.28) |
| Monochlorophenoxy acid or ester  | MCPA, dimethylamine salt | 32-36 | P8 | 132/22376 | 1460/196001 | 0.80 (0.67-0.97) |
| Morpholine                       | Dimethomorph             | 32-36 | P8 | 19/22489  | 194/197267  | 0.81 (0.50-1.34) |
| Morpholine                       | Morpholine               | 32-36 | P8 | 11/22497  | 281/197180  | 0.33 (0.18-0.63) |
| N-Methyl Carbamate               | Aldicarb                 | 24-27 | P6 | 9/1783    | 796/196665  | 1.36 (0.70-2.62) |
| N-Methyl Carbamate               | Aldicarb                 | 28-31 | P7 | 8/3090    | 833/196628  | 0.58 (0.28-1.22) |

|                                    |                           |       |    |           |             |                  |
|------------------------------------|---------------------------|-------|----|-----------|-------------|------------------|
| N-Methyl Carbamate                 | Aldicarb                  | 32-36 | P8 | 75/22433  | 768/196693  | 0.89 (0.70-1.13) |
| N-Methyl Carbamate                 | Carbaryl                  | 24-27 | P6 | 7/1785    | 1117/196344 | 0.73 (0.35-1.55) |
| N-Methyl Carbamate                 | Carbaryl                  | 28-31 | P7 | 14/3084   | 1097/196364 | 0.80 (0.46-1.38) |
| N-Methyl Carbamate                 | Carbaryl                  | 32-36 | P8 | 97/22411  | 1117/196344 | 0.75 (0.61-0.93) |
| N-Methyl Carbamate                 | Carbofuran                | 32-36 | P8 | 22/22486  | 218/197243  | 0.89 (0.57-1.40) |
| N-Methyl Carbamate                 | Formetanate hydrochloride | 20-23 | P5 | 6/509     | 1183/196278 | 1.97 (0.88-4.43) |
| N-Methyl Carbamate                 | Formetanate hydrochloride | 24-27 | P6 | 9/1783    | 1177/196284 | 0.88 (0.46-1.71) |
| N-Methyl Carbamate                 | Formetanate hydrochloride | 28-31 | P7 | 15/3083   | 1159/196302 | 0.87 (0.52-1.45) |
| N-Methyl Carbamate                 | Formetanate hydrochloride | 32-36 | P8 | 109/22399 | 1132/196329 | 0.86 (0.70-1.05) |
| N-Methyl Carbamate                 | Methomyl                  | 24-27 | P6 | 14/1778   | 2269/195192 | 0.72 (0.42-1.21) |
| N-Methyl Carbamate                 | Methomyl                  | 28-31 | P7 | 37/3061   | 2269/195192 | 1.06 (0.76-1.48) |
| N-Methyl Carbamate                 | Methomyl                  | 32-36 | P8 | 220/22288 | 2331/195130 | 0.84 (0.73-0.97) |
| N-Methyl Carbamate                 | Oxamyl                    | 28-31 | P7 | 9/3089    | 362/197099  | 1.64 (0.84-3.18) |
| N-Methyl Carbamate                 | Oxamyl                    | 32-36 | P8 | 45/22463  | 360/197101  | 1.12 (0.82-1.53) |
| N-Methyl Carbamate                 | Thiodicarb                | 32-36 | P8 | 5/22503   | 49/197412   | 0.92 (0.37-2.32) |
| Naphthalene acetic acid derivative | 1-naphthaleneacetamide    | 32-36 | P8 | 5/22503   | 35/197426   | 1.31 (0.51-3.36) |
| Neonicotinoid                      | Acetamiprid               | 24-27 | P6 | 11/1781   | 781/196680  | 1.63 (0.90-2.97) |
| Neonicotinoid                      | Acetamiprid               | 28-31 | P7 | 17/3081   | 823/196638  | 1.42 (0.88-2.30) |
| Neonicotinoid                      | Acetamiprid               | 32-36 | P8 | 112/22396 | 848/196613  | 1.17 (0.96-1.43) |
| Neonicotinoid                      | Clothianidin              | 32-36 | P8 | 21/22487  | 90/197371   | 2.08 (1.28-3.39) |
| Neonicotinoid                      | Dinotefuran               | 32-36 | P8 | 13/22495  | 86/197375   | 1.32 (0.74-2.37) |
| Neonicotinoid                      | Imidacloprid              | 20-23 | P5 | 5/510     | 4228/193233 | 0.48 (0.20-1.16) |
| Neonicotinoid                      | Imidacloprid              | 24-27 | P6 | 24/1768   | 4250/193211 | 0.61 (0.40-0.93) |
| Neonicotinoid                      | Imidacloprid              | 28-31 | P7 | 64/3034   | 4352/193109 | 0.99 (0.77-1.28) |
| Neonicotinoid                      | Imidacloprid              | 32-36 | P8 | 461/22047 | 4287/193174 | 0.97 (0.87-1.07) |
| Neonicotinoid                      | Thiamethoxam              | 28-31 | P7 | 7/3091    | 380/197081  | 1.21 (0.57-2.57) |
| Neonicotinoid                      | Thiamethoxam              | 32-36 | P8 | 38/22470  | 396/197065  | 0.79 (0.56-1.12) |
| Organoarsenic                      | Cacodylic acid            | 32-36 | P8 | 12/22496  | 149/197312  | 0.74 (0.41-1.33) |
| Organoarsenic                      | MSMA                      | 32-36 | P8 | 10/22498  | 161/197300  | 0.56 (0.30-1.06) |
| Organoarsenic                      | Sodium cacodylate         | 32-36 | P8 | 12/22496  | 149/197312  | 0.74 (0.41-1.33) |
| Organochlorine                     | Dicofol                   | 24-27 | P6 | 8/1784    | 1028/196433 | 0.95 (0.47-1.90) |
| Organochlorine                     | Dicofol                   | 28-31 | P7 | 14/3084   | 994/196467  | 0.97 (0.57-1.64) |
| Organochlorine                     | Dicofol                   | 32-36 | P8 | 77/22431  | 994/196467  | 0.69 (0.54-0.87) |
| Organochlorine                     | Endosulfan                | 32-36 | P8 | 31/22477  | 290/197171  | 0.99 (0.68-1.44) |
| Organophosphate                    | Acephate                  | 24-27 | P6 | 10/1782   | 697/196764  | 1.73 (0.92-3.25) |
| Organophosphate                    | Acephate                  | 32-36 | P8 | 71/22437  | 761/196700  | 0.78 (0.61-1.01) |

|                 |                  |       |    |           |             |                  |
|-----------------|------------------|-------|----|-----------|-------------|------------------|
| Organophosphate | Azinphos-methyl  | 28-31 | P7 | 6/3092    | 449/197012  | 0.94 (0.42-2.10) |
| Organophosphate | Azinphos-methyl  | 32-36 | P8 | 45/22463  | 457/197004  | 0.89 (0.65-1.22) |
| Organophosphate | Bensulide        | 28-31 | P7 | 12/3086   | 580/196881  | 1.57 (0.88-2.78) |
| Organophosphate | Bensulide        | 32-36 | P8 | 52/22456  | 559/196902  | 0.88 (0.66-1.17) |
| Organophosphate | Chlorpyrifos     | 20-23 | P5 | 19/496    | 7649/189812 | 0.91 (0.56-1.48) |
| Organophosphate | Chlorpyrifos     | 24-27 | P6 | 51/1741   | 7581/189880 | 0.80 (0.61-1.06) |
| Organophosphate | Chlorpyrifos     | 28-31 | P7 | 100/2998  | 7717/189744 | 0.85 (0.69-1.04) |
| Organophosphate | Chlorpyrifos     | 32-36 | P8 | 726/21782 | 7730/189731 | 0.84 (0.78-0.91) |
| Organophosphate | Diazinon         | 24-27 | P6 | 12/1780   | 1903/195558 | 0.74 (0.42-1.31) |
| Organophosphate | Diazinon         | 28-31 | P7 | 26/3072   | 1911/195550 | 0.91 (0.61-1.35) |
| Organophosphate | Diazinon         | 32-36 | P8 | 159/22349 | 1935/195526 | 0.75 (0.64-0.88) |
| Organophosphate | Dimethoate       | 20-23 | P5 | 7/508     | 2358/195103 | 1.06 (0.47-2.37) |
| Organophosphate | Dimethoate       | 24-27 | P6 | 17/1775   | 2416/195045 | 0.84 (0.52-1.36) |
| Organophosphate | Dimethoate       | 28-31 | P7 | 23/3075   | 2526/194935 | 0.64 (0.42-0.97) |
| Organophosphate | Dimethoate       | 32-36 | P8 | 237/22271 | 2541/194920 | 0.81 (0.71-0.93) |
| Organophosphate | Ethephon         | 24-27 | P6 | 14/1778   | 1882/195579 | 0.78 (0.45-1.35) |
| Organophosphate | Ethephon         | 28-31 | P7 | 23/3075   | 2057/195404 | 0.78 (0.51-1.18) |
| Organophosphate | Ethephon         | 32-36 | P8 | 213/22295 | 2120/195341 | 0.91 (0.78-1.05) |
| Organophosphate | Ethoprop         | 32-36 | P8 | 5/22503   | 69/197392   | 0.66 (0.27-1.64) |
| Organophosphate | Fenamiphos       | 28-31 | P7 | 5/3093    | 362/197099  | 0.95 (0.39-2.30) |
| Organophosphate | Fenamiphos       | 32-36 | P8 | 35/22473  | 353/197108  | 0.92 (0.65-1.30) |
| Organophosphate | Malathion        | 24-27 | P6 | 6/1786    | 935/196526  | 0.76 (0.34-1.70) |
| Organophosphate | Malathion        | 28-31 | P7 | 12/3086   | 998/196463  | 0.83 (0.47-1.47) |
| Organophosphate | Malathion        | 32-36 | P8 | 108/22400 | 1037/196424 | 0.92 (0.75-1.13) |
| Organophosphate | Methamidophos    | 32-36 | P8 | 10/22498  | 89/197372   | 1.08 (0.56-2.08) |
| Organophosphate | Methidathion     | 28-31 | P7 | 11/3087   | 809/196652  | 0.98 (0.54-1.79) |
| Organophosphate | Methidathion     | 32-36 | P8 | 75/22433  | 813/196648  | 0.85 (0.67-1.08) |
| Organophosphate | Methyl parathion | 28-31 | P7 | 10/3088   | 849/196612  | 0.83 (0.45-1.56) |
| Organophosphate | Methyl parathion | 32-36 | P8 | 60/22448  | 790/196671  | 0.69 (0.53-0.90) |
| Organophosphate | Methyl parathion | 28-31 | P7 | 10/3088   | 849/196612  | 0.83 (0.45-1.56) |
| Organophosphate | Methyl parathion | 32-36 | P8 | 60/22448  | 789/196672  | 0.69 (0.53-0.90) |
| Organophosphate | Naled            | 28-31 | P7 | 6/3092    | 478/196983  | 0.84 (0.38-1.89) |
| Organophosphate | Naled            | 32-36 | P8 | 42/22466  | 497/196964  | 0.76 (0.55-1.04) |
| Organophosphate | Phosmet          | 20-23 | P5 | 9/506     | 2689/194772 | 1.27 (0.63-2.55) |
| Organophosphate | Phosmet          | 24-27 | P6 | 21/1771   | 2698/194763 | 0.89 (0.57-1.39) |
| Organophosphate | Phosmet          | 28-31 | P7 | 49/3049   | 2674/194787 | 1.25 (0.94-1.67) |
| Organophosphate | Phosmet          | 32-36 | P8 | 263/22245 | 2638/194823 | 0.90 (0.79-1.03) |

|                               |                           |       |    |           |             |                  |
|-------------------------------|---------------------------|-------|----|-----------|-------------|------------------|
| Organophosphate               | Profenofos                | 32-36 | P8 | 6/22502   | 20/197441   | 2.87 (1.15-7.21) |
| Organotin                     | Fenbutatin-oxide          | 28-31 | P7 | 11/3087   | 1221/196240 | 0.63 (0.35-1.14) |
| Organotin                     | Fenbutatin-oxide          | 32-36 | P8 | 84/22424  | 1243/196218 | 0.60 (0.48-0.75) |
| Petroleum derivative-aromatic | Kerosine                  | 28-31 | P7 | 5/3093    | 178/197283  | 2.00 (0.82-4.89) |
| Petroleum derivative-aromatic | Kerosine                  | 32-36 | P8 | 12/22496  | 170/197291  | 0.65 (0.36-1.18) |
| Petroleum derivative-Aromatic | MINERAL OIL (code: 00401) | 20-23 | P5 | 12/503    | 4414/193047 | 0.95 (0.51-1.78) |
| Petroleum derivative-Aromatic | MINERAL OIL (code: 00401) | 24-27 | P6 | 30/1762   | 4405/193056 | 0.82 (0.57-1.18) |
| Petroleum derivative-Aromatic | MINERAL OIL (code: 00401) | 28-31 | P7 | 57/3041   | 4501/192960 | 0.87 (0.67-1.14) |
| Petroleum derivative-Aromatic | MINERAL OIL (code: 00401) | 32-36 | P8 | 474/22034 | 4523/192938 | 0.94 (0.85-1.03) |
| Petroleum derivative-Aromatic | MINERAL OIL (code: 00473) | 28-31 | P7 | 8/3090    | 678/196783  | 0.81 (0.40-1.63) |
| Petroleum derivative-Aromatic | MINERAL OIL (code: 00473) | 32-36 | P8 | 46/22462  | 674/196787  | 0.64 (0.47-0.86) |
| Petroleum derivative-Aromatic | MINERAL OIL (code: 00763) | 20-23 | P5 | 5/510     | 1112/196349 | 1.85 (0.76-4.48) |
| Petroleum derivative-Aromatic | MINERAL OIL (code: 00763) | 24-27 | P6 | 10/1782   | 1128/196333 | 1.05 (0.56-1.96) |
| Petroleum derivative-Aromatic | MINERAL OIL (code: 00763) | 28-31 | P7 | 12/3086   | 1081/196380 | 0.76 (0.43-1.34) |
| Petroleum derivative-Aromatic | MINERAL OIL (code: 00763) | 32-36 | P8 | 75/22433  | 1122/196339 | 0.61 (0.48-0.77) |
| Petroleum derivative-Aromatic | MINERAL OIL (code: 00765) | 20-23 | P5 | 12/503    | 6342/191119 | 0.78 (0.44-1.39) |
| Petroleum derivative-Aromatic | MINERAL OIL (code: 00765) | 24-27 | P6 | 43/1749   | 6146/191315 | 0.82 (0.60-1.11) |
| Petroleum derivative-Aromatic | MINERAL OIL (code: 00765) | 28-31 | P7 | 76/3022   | 6169/191292 | 0.87 (0.69-1.09) |
| Petroleum derivative-Aromatic | MINERAL OIL (code: 00765) | 32-36 | P8 | 583/21925 | 6268/191193 | 0.83 (0.76-0.91) |
| Petroleum derivative-Aromatic | MINERAL OIL (code: 02045) | 20-23 | P5 | 5/510     | 1159/196302 | 1.50 (0.56-4.02) |
| Petroleum derivative-Aromatic | MINERAL OIL (code: 02045) | 24-27 | P6 | 12/1780   | 1126/196335 | 1.27 (0.72-2.25) |

|                                |                                                           |       |    |            |              |                  |
|--------------------------------|-----------------------------------------------------------|-------|----|------------|--------------|------------------|
| Petroleum derivative-Aromatic  | MINERAL OIL (code: 02045)                                 | 28-31 | P7 | 10/3088    | 1133/196328  | 0.61 (0.32-1.13) |
| Petroleum derivative-Aromatic  | MINERAL OIL (code: 02045)                                 | 32-36 | P8 | 85/22423   | 1140/196321  | 0.69 (0.55-0.86) |
| Petroleum derivative-Aromatic  | Xylene range aromatic solvent                             | 32-36 | P8 | 11/22497   | 96/197365    | 1.02 (0.55-1.91) |
| Petroleum derivative-Saturated | Mineral oil, petroleum distillates, solvent refined light | 32-36 | P8 | 35/22473   | 269/197192   | 1.15 (0.81-1.65) |
| Phosphine                      | Aluminum phosphide                                        | 24-27 | P6 | 5/1787     | 997/196464   | 0.64 (0.26-1.53) |
| Phosphine                      | Aluminum phosphide                                        | 28-31 | P7 | 8/3090     | 986/196475   | 0.51 (0.24-1.08) |
| Phosphine                      | Aluminum phosphide                                        | 32-36 | P8 | 87/22421   | 973/196488   | 0.83 (0.66-1.03) |
| Phosphonoglycine               | Glufosinate-ammonium                                      | 20-23 | P5 | 6/509      | 1762/195699  | 1.44 (0.64-3.24) |
| Phosphonoglycine               | Glufosinate-ammonium                                      | 24-27 | P6 | 13/1779    | 1784/195677  | 0.89 (0.51-1.54) |
| Phosphonoglycine               | Glufosinate-ammonium                                      | 28-31 | P7 | 29/3069    | 1826/195635  | 1.01 (0.69-1.50) |
| Phosphonoglycine               | Glufosinate-ammonium                                      | 32-36 | P8 | 276/22232  | 1778/195683  | 1.40 (1.23-1.59) |
| Phosphonoglycine               | Glyphosate                                                | 24-27 | P6 | 5/1787     | 1255/196206  | 0.48 (0.20-1.16) |
| Phosphonoglycine               | Glyphosate                                                | 28-31 | P7 | 22/3076    | 1187/196274  | 1.30 (0.85-2.01) |
| Phosphonoglycine               | Glyphosate                                                | 32-36 | P8 | 131/22377  | 1208/196253  | 0.97 (0.81-1.17) |
| Phosphonoglycine               | Glyphosate, diammonium salt                               | 32-36 | P8 | 71/22437   | 530/196931   | 1.20 (0.93-1.55) |
| Phosphonoglycine               | Glyphosate, isopropylamine salt                           | 20-23 | P5 | 46/469     | 22566/174895 | 0.77 (0.56-1.06) |
| Phosphonoglycine               | Glyphosate, isopropylamine salt                           | 24-27 | P6 | 142/1650   | 22466/174995 | 0.71 (0.59-0.84) |
| Phosphonoglycine               | Glyphosate, isopropylamine salt                           | 28-31 | P7 | 269/2829   | 22408/175053 | 0.78 (0.69-0.89) |
| Phosphonoglycine               | Glyphosate, isopropylamine salt                           | 32-36 | P8 | 2244/20264 | 22228/175233 | 0.90 (0.86-0.94) |
| Phosphonoglycine               | Glyphosate, monoammonium salt                             | 32-36 | P8 | 24/22484   | 306/197155   | 0.71 (0.47-1.08) |
| Phosphonoglycine               | Glyphosate, potassium salt                                | 20-23 | P5 | 9/506      | 4273/193188  | 0.68 (0.32-1.43) |
| Phosphonoglycine               | Glyphosate, potassium salt                                | 24-27 | P6 | 31/1761    | 4528/192933  | 0.83 (0.58-1.18) |
| Phosphonoglycine               | Glyphosate, potassium salt                                | 28-31 | P7 | 56/3042    | 4451/193010  | 0.85 (0.65-1.12) |
| Phosphonoglycine               | Glyphosate, potassium salt                                | 32-36 | P8 | 516/21992  | 4392/193069  | 1.05 (0.96-1.16) |
| Phosphonoglycine               | Glyphosate-trimesium                                      | 28-31 | P7 | 8/3090     | 494/196967   | 1.12 (0.56-2.26) |
| Phosphonoglycine               | Glyphosate-trimesium                                      | 32-36 | P8 | 38/22470   | 469/196992   | 0.75 (0.54-1.04) |
| Piperonyl                      | Piperonyl butoxide                                        | 32-36 | P8 | 48/22460   | 465/196996   | 0.94 (0.69-1.28) |
| Piperonyl                      | Piperonyl butoxide                                        | 32-36 | P8 | 48/22460   | 458/197003   | 0.96 (0.71-1.30) |
| Polyalkyloxy Compound          | 2,6,8-trimethyl-4-nonyloxy                                | 32-36 | P8 | 8/22500    | 132/197329   | 0.59 (0.29-1.21) |

|                       |                                                                                                   |       |    |          |             |                  |
|-----------------------|---------------------------------------------------------------------------------------------------|-------|----|----------|-------------|------------------|
|                       | polyethylene oxyethanol                                                                           |       |    |          |             |                  |
| Polyalkyloxy Compound | 4-nonylphenol, formaldehyde resin, propoxylated                                                   | 32-36 | P8 | 27/22481 | 349/197112  | 0.70 (0.47-1.04) |
| Polyalkyloxy Compound | A-(p-nonylphenyl)-omega-hydroxypoly (oxyethylene) with an average of 9-10 moles of ethylene oxide | 32-36 | P8 | 15/22493 | 177/197284  | 0.81 (0.48-1.38) |
| Polyalkyloxy Compound | Alkyl (C8,C10) polyglycoside                                                                      | 32-36 | P8 | 5/22503  | 71/197390   | 0.52 (0.19-1.44) |
| Polyalkyloxy Compound | Alkyl oxy-polyoxyethylene and alkyl phenyloxy-polyoxyethylene                                     | 28-31 | P7 | 5/3093   | 474/196987  | 0.71 (0.29-1.71) |
| Polyalkyloxy Compound | Alkyl oxy-polyoxyethylene and alkyl phenyloxy-polyoxyethylene                                     | 32-36 | P8 | 34/22474 | 455/197006  | 0.69 (0.49-0.98) |
| Polyalkyloxy Compound | Alkyl polyethylene glycol ether                                                                   | 24-27 | P6 | 5/1787   | 621/196840  | 0.91 (0.38-2.21) |
| Polyalkyloxy Compound | Alkyl polyethylene glycol ether                                                                   | 28-31 | P7 | 8/3090   | 615/196846  | 0.88 (0.44-1.78) |
| Polyalkyloxy Compound | Alkyl polyethylene glycol ether                                                                   | 32-36 | P8 | 52/22456 | 617/196844  | 0.78 (0.59-1.04) |
| Polyalkyloxy Compound | Alkyl polyoxy ethylene ethers, polymerized resins and fatty acids                                 | 20-23 | P5 | 6/509    | 1169/196292 | 2.12 (0.94-4.76) |
| Polyalkyloxy Compound | Alkyl polyoxy ethylene ethers, polymerized resins and fatty acids                                 | 24-27 | P6 | 7/1785   | 1142/196319 | 0.72 (0.34-1.51) |
| Polyalkyloxy Compound | Alkyl polyoxy ethylene ethers, polymerized resins and fatty acids                                 | 28-31 | P7 | 13/3085  | 1073/196388 | 0.75 (0.42-1.33) |
| Polyalkyloxy Compound | Alkyl polyoxy ethylene ethers, polymerized resins and fatty acids                                 | 32-36 | P8 | 75/22433 | 1062/196399 | 0.64 (0.51-0.81) |
| Polyalkyloxy Compound | Alkyl polyoxy ethylene glycols                                                                    | 32-36 | P8 | 5/22503  | 55/197406   | 0.88 (0.35-2.21) |
| Polyalkyloxy Compound | Alkylaryl polyether alcohol                                                                       | 32-36 | P8 | 10/22498 | 141/197320  | 0.63 (0.33-1.21) |
| Polyalkyloxy Compound | Alkylaryl polyethylene glycol ether                                                               | 32-36 | P8 | 20/22488 | 232/197229  | 0.77 (0.48-1.23) |
| Polyalkyloxy Compound | Alkylaryl polyoxyethylene ether                                                                   | 28-31 | P7 | 8/3090   | 639/196822  | 0.86 (0.43-1.72) |
| Polyalkyloxy Compound | Alkylaryl polyoxyethylene ether                                                                   | 32-36 | P8 | 52/22456 | 661/196800  | 0.70 (0.52-0.93) |
| Polyalkyloxy Compound | Alkylaryl polyoxyethylene ethanol                                                                 | 28-31 | P7 | 8/3090   | 538/196923  | 1.03 (0.51-2.08) |

|                       |                                                                           |       |    |           |             |                  |
|-----------------------|---------------------------------------------------------------------------|-------|----|-----------|-------------|------------------|
| Polyalkyloxy Compound | Alkylaryl polyoxyethylene ethanol                                         | 32-36 | P8 | 49/22459  | 560/196901  | 0.81 (0.60-1.08) |
| Polyalkyloxy Compound | Alpha-(para-nonylphenyl)-omega-hydroxypoly(oxyethylene)                   | 20-23 | P5 | 8/507     | 3327/194134 | 0.89 (0.42-1.88) |
| Polyalkyloxy Compound | Alpha-(para-nonylphenyl)-omega-hydroxypoly(oxyethylene)                   | 24-27 | P6 | 22/1770   | 3178/194283 | 0.76 (0.49-1.18) |
| Polyalkyloxy Compound | Alpha-(para-nonylphenyl)-omega-hydroxypoly(oxyethylene)                   | 28-31 | P7 | 52/3046   | 3274/194187 | 1.06 (0.80-1.41) |
| Polyalkyloxy Compound | Alpha-(para-nonylphenyl)-omega-hydroxypoly(oxyethylene)                   | 32-36 | P8 | 207/22301 | 3230/194231 | 0.57 (0.49-0.66) |
| Polyalkyloxy Compound | Alpha-(para-nonylphenyl)-omega-hydroxypoly(oxyethylene), phosphate ester  | 32-36 | P8 | 13/22495  | 221/197240  | 0.50 (0.28-0.89) |
| Polyalkyloxy Compound | Alpha-alkyl (C12-C15)-omega-hydroxypoly(oxyethylene) sulfate, sodium salt | 32-36 | P8 | 7/22501   | 148/197313  | 0.44 (0.21-0.94) |
| Polyalkyloxy Compound | Alpha-alkyl (C12-C18)-omega-hydroxypoly(oxyethylene) poly(oxypropylene)   | 28-31 | P7 | 8/3090    | 544/196917  | 1.04 (0.52-2.10) |
| Polyalkyloxy Compound | Alpha-alkyl (C12-C18)-omega-hydroxypoly(oxyethylene) poly(oxypropylene)   | 32-36 | P8 | 29/22479  | 596/196865  | 0.44 (0.30-0.64) |
| Polyalkyloxy Compound | Alpha-alkyl (C8-C18)-omega-hydroxypoly(oxyethylene) poly(oxypropylene)    | 32-36 | P8 | 26/22482  | 313/197148  | 0.68 (0.44-1.03) |
| Polyalkyloxy Compound | Alpha-alkyl (C9-C11)-omega-hydroxypoly(oxyethylene)                       | 32-36 | P8 | 5/22503   | 31/197430   | 0.89 (0.27-2.91) |
| Polyalkyloxy Compound | Alpha-alkyl-omega-hydroxypoly(oxyethylene)                                | 32-36 | P8 | 15/22493  | 165/197296  | 0.83 (0.49-1.40) |
| Polyalkyloxy Compound | Alpha-alkylaryl-omega-hydroxypoly(oxyethylene)                            | 20-23 | P5 | 9/506     | 4207/193254 | 0.89 (0.46-1.73) |
| Polyalkyloxy Compound | Alpha-alkylaryl-omega-hydroxypoly(oxyethylene)                            | 24-27 | P6 | 31/1761   | 4157/193304 | 0.87 (0.61-1.25) |
| Polyalkyloxy Compound | Alpha-alkylaryl-omega-hydroxypoly(oxyethylene)                            | 28-31 | P7 | 52/3046   | 3989/193472 | 0.86 (0.65-1.14) |

|                       |                                                                                              |       |    |           |             |                  |
|-----------------------|----------------------------------------------------------------------------------------------|-------|----|-----------|-------------|------------------|
| Polyalkyloxy Compound | Alpha-alkylaryl-omega-hydroxypoly(oxyethylene)                                               | 32-36 | P8 | 290/22218 | 4051/193410 | 0.65 (0.58-0.74) |
| Polyalkyloxy Compound | Alpha-alkylphenyl-omega-hydroxypoly(oxyethylene)                                             | 24-27 | P6 | 6/1786    | 870/196591  | 0.81 (0.36-1.80) |
| Polyalkyloxy Compound | Alpha-alkylphenyl-omega-hydroxypoly(oxyethylene)                                             | 28-31 | P7 | 8/3090    | 827/196634  | 0.66 (0.33-1.33) |
| Polyalkyloxy Compound | Alpha-alkylphenyl-omega-hydroxypoly(oxyethylene)                                             | 32-36 | P8 | 52/22456  | 815/196646  | 0.58 (0.44-0.77) |
| Polyalkyloxy Compound | Alpha-octylphenyl-omega-hydroxypoly(oxyethylene)                                             | 20-23 | P5 | 6/509     | 1915/195546 | 1.33 (0.59-2.99) |
| Polyalkyloxy Compound | Alpha-octylphenyl-omega-hydroxypoly(oxyethylene)                                             | 24-27 | P6 | 8/1784    | 1858/195603 | 0.44 (0.21-0.94) |
| Polyalkyloxy Compound | Alpha-octylphenyl-omega-hydroxypoly(oxyethylene)                                             | 28-31 | P7 | 31/3067   | 1863/195598 | 1.11 (0.77-1.60) |
| Polyalkyloxy Compound | Alpha-octylphenyl-omega-hydroxypoly(oxyethylene)                                             | 32-36 | P8 | 131/22377 | 1806/195655 | 0.66 (0.55-0.79) |
| Polyalkyloxy Compound | Alpha-undecyl-omega-hydroxypoly(oxyethylene)                                                 | 32-36 | P8 | 8/22500   | 81/197380   | 0.77 (0.36-1.67) |
| Polyalkyloxy Compound | Alpha-[para-(1,1,3,3-tetramethylbutyl)phenyl]-omega-hydroxypoly(oxyethylene) phosphate ester | 28-31 | P7 | 11/3087   | 849/196612  | 0.94 (0.52-1.72) |
| Polyalkyloxy Compound | Alpha-[para-(1,1,3,3-tetramethylbutyl)phenyl]-omega-hydroxypoly(oxyethylene) phosphate ester | 32-36 | P8 | 61/22447  | 860/196601  | 0.67 (0.52-0.87) |
| Polyalkyloxy Compound | Ethylene oxide adduct nonylphenol                                                            | 20-23 | P5 | 5/510     | 1680/195781 | 1.28 (0.53-3.11) |
| Polyalkyloxy Compound | Ethylene oxide adduct nonylphenol                                                            | 24-27 | P6 | 12/1780   | 1687/195774 | 0.86 (0.48-1.52) |
| Polyalkyloxy Compound | Ethylene oxide adduct nonylphenol                                                            | 28-31 | P7 | 24/3074   | 1684/195777 | 0.95 (0.63-1.43) |
| Polyalkyloxy Compound | Ethylene oxide adduct nonylphenol                                                            | 32-36 | P8 | 109/22399 | 1772/195689 | 0.55 (0.46-0.67) |
| Polyalkyloxy Compound | Polyethoxylated alkyl (C6-C22) aryl ethers                                                   | 32-36 | P8 | 7/22501   | 58/197403   | 1.18 (0.54-2.60) |
| Polyalkyloxy Compound | Polyoxyethylene ester of resin and rosin acids                                               | 24-27 | P6 | 8/1784    | 887/196574  | 1.06 (0.53-2.14) |

|                       |                                                  |       |    |           |             |                  |
|-----------------------|--------------------------------------------------|-------|----|-----------|-------------|------------------|
| Polyalkyloxy Compound | Polyoxyethylene ester of resin and rosin acids   | 28-31 | P7 | 10/3088   | 934/196527  | 0.74 (0.39-1.38) |
| Polyalkyloxy Compound | Polyoxyethylene ester of resin and rosin acids   | 32-36 | P8 | 56/22452  | 916/196545  | 0.56 (0.43-0.74) |
| Polyalkyloxy Compound | Polyoxyethylene polymer                          | 32-36 | P8 | 29/22479  | 314/197147  | 0.85 (0.58-1.24) |
| Polyalkyloxy Compound | Polyoxyethylene sorbitol, mixed ether ester      | 32-36 | P8 | 9/22499   | 70/197391   | 1.20 (0.60-2.41) |
| Polyalkyloxy Compound | Polyoxypropylene-polyoxyethylene block copolymer | 28-31 | P7 | 9/3089    | 674/196787  | 0.71 (0.34-1.51) |
| Polyalkyloxy Compound | Polyoxypropylene-polyoxyethylene block copolymer | 32-36 | P8 | 46/22462  | 742/196719  | 0.57 (0.42-0.76) |
| Pyrazole              | Fenpyroximate                                    | 32-36 | P8 | 20/22488  | 196/197265  | 0.92 (0.57-1.48) |
| Pyrazolylphenyl       | Pyraflufen-ethyl                                 | 32-36 | P8 | 54/22454  | 448/197013  | 1.06 (0.80-1.42) |
| Pyrethroid            | (S)-cypermethrin                                 | 24-27 | P6 | 7/1785    | 560/196901  | 1.55 (0.74-3.29) |
| Pyrethroid            | (S)-cypermethrin                                 | 28-31 | P7 | 8/3090    | 556/196905  | 1.02 (0.51-2.05) |
| Pyrethroid            | (S)-cypermethrin                                 | 32-36 | P8 | 62/22446  | 568/196893  | 0.94 (0.72-1.23) |
| Pyrethroid            | Bifenthrin                                       | 24-27 | P6 | 7/1785    | 1320/196141 | 0.46 (0.19-1.10) |
| Pyrethroid            | Bifenthrin                                       | 28-31 | P7 | 14/3084   | 1331/196130 | 0.74 (0.44-1.26) |
| Pyrethroid            | Bifenthrin                                       | 32-36 | P8 | 125/22383 | 1370/196091 | 0.80 (0.66-0.97) |
| Pyrethroid            | Cyfluthrin (code:02223)                          | 24-27 | P6 | 8/1784    | 1298/196163 | 0.71 (0.36-1.43) |
| Pyrethroid            | Cyfluthrin (code:02223)                          | 28-31 | P7 | 21/3077   | 1271/196190 | 1.12 (0.73-1.73) |
| Pyrethroid            | Cyfluthrin (code:02223)                          | 32-36 | P8 | 112/22396 | 1314/196147 | 0.75 (0.62-0.92) |
| Pyrethroid            | Cyfluthrin (code:03956)                          | 24-27 | P6 | 5/1787    | 444/197017  | 1.34 (0.55-3.25) |
| Pyrethroid            | Cyfluthrin (code:03956)                          | 28-31 | P7 | 8/3090    | 508/196953  | 1.11 (0.55-2.23) |
| Pyrethroid            | Cyfluthrin (code:03956)                          | 32-36 | P8 | 67/22441  | 480/196981  | 1.23 (0.95-1.60) |
| Pyrethroid            | Cypermethrin                                     | 28-31 | P7 | 7/3091    | 343/197118  | 1.29 (0.57-2.89) |
| Pyrethroid            | Cypermethrin                                     | 32-36 | P8 | 30/22478  | 317/197144  | 0.87 (0.59-1.27) |
| Pyrethroid            | Esfenvalerate                                    | 20-23 | P5 | 9/506     | 5308/192153 | 0.70 (0.36-1.36) |
| Pyrethroid            | Esfenvalerate                                    | 24-27 | P6 | 38/1754   | 5152/192309 | 0.81 (0.58-1.14) |
| Pyrethroid            | Esfenvalerate                                    | 28-31 | P7 | 67/3031   | 5280/192181 | 0.87 (0.68-1.12) |
| Pyrethroid            | Esfenvalerate                                    | 32-36 | P8 | 523/21985 | 5232/192229 | 0.90 (0.82-0.99) |
| Pyrethroid            | Fenpropathrin                                    | 20-23 | P5 | 5/510     | 772/196689  | 2.09 (0.78-5.62) |
| Pyrethroid            | Fenpropathrin                                    | 24-27 | P6 | 9/1783    | 833/196628  | 1.24 (0.64-2.40) |
| Pyrethroid            | Fenpropathrin                                    | 28-31 | P7 | 9/3089    | 832/196629  | 0.75 (0.39-1.44) |
| Pyrethroid            | Fenpropathrin                                    | 32-36 | P8 | 111/22397 | 842/196619  | 1.18 (0.96-1.44) |
| Pyrethroid            | Lambda-cyhalothrin                               | 20-23 | P5 | 6/509     | 2450/195011 | 0.69 (0.26-1.85) |

|                              |                                                                                           |       |    |           |             |                  |
|------------------------------|-------------------------------------------------------------------------------------------|-------|----|-----------|-------------|------------------|
| Pyrethroid                   | Lambda-cyhalothrin                                                                        | 24-27 | P6 | 16/1776   | 2517/194944 | 0.77 (0.47-1.26) |
| Pyrethroid                   | Lambda-cyhalothrin                                                                        | 28-31 | P7 | 26/3072   | 2596/194865 | 0.69 (0.46-1.02) |
| Pyrethroid                   | Lambda-cyhalothrin                                                                        | 32-36 | P8 | 266/22242 | 2555/194906 | 0.93 (0.82-1.06) |
| Pyrethroid                   | Permethrin                                                                                | 20-23 | P5 | 5/510     | 2120/195341 | 0.83 (0.31-2.21) |
| Pyrethroid                   | Permethrin                                                                                | 24-27 | P6 | 12/1780   | 2158/195303 | 0.62 (0.34-1.12) |
| Pyrethroid                   | Permethrin                                                                                | 28-31 | P7 | 27/3071   | 2127/195334 | 0.90 (0.61-1.32) |
| Pyrethroid                   | Permethrin                                                                                | 32-36 | P8 | 202/22306 | 2133/195328 | 0.83 (0.72-0.97) |
| Pyrethroid                   | Pyrethrins                                                                                | 24-27 | P6 | 7/1785    | 805/196656  | 1.03 (0.49-2.17) |
| Pyrethroid                   | Pyrethrins                                                                                | 28-31 | P7 | 14/3084   | 788/196673  | 1.21 (0.71-2.06) |
| Pyrethroid                   | Pyrethrins                                                                                | 32-36 | P8 | 93/22415  | 802/196659  | 1.01 (0.81-1.27) |
| Pyrethroid                   | Tau-fluvalinate                                                                           | 32-36 | P8 | 16/22492  | 138/197323  | 0.93 (0.54-1.61) |
| Pyridazinone                 | Norflurazon                                                                               | 20-23 | P5 | 7/508     | 2042/195419 | 1.45 (0.69-3.07) |
| Pyridazinone                 | Norflurazon                                                                               | 24-27 | P6 | 6/1786    | 1992/195469 | 0.36 (0.16-0.81) |
| Pyridazinone                 | Norflurazon                                                                               | 28-31 | P7 | 22/3076   | 2010/195451 | 0.74 (0.48-1.14) |
| Pyridazinone                 | Norflurazon                                                                               | 32-36 | P8 | 148/22360 | 2021/195440 | 0.66 (0.56-0.79) |
| Pyrimidine                   | Cyprodinil                                                                                | 20-23 | P5 | 6/509     | 2226/195235 | 1.13 (0.51-2.54) |
| Pyrimidine                   | Cyprodinil                                                                                | 24-27 | P6 | 14/1778   | 2282/195179 | 0.69 (0.40-1.19) |
| Pyrimidine                   | Cyprodinil                                                                                | 28-31 | P7 | 34/3064   | 2124/195337 | 1.11 (0.79-1.57) |
| Pyrimidine                   | Cyprodinil                                                                                | 32-36 | P8 | 167/22341 | 2152/195309 | 0.70 (0.60-0.83) |
| Pyrimidine                   | Fenarimol                                                                                 | 24-27 | P6 | 8/1784    | 1379/196082 | 0.68 (0.34-1.36) |
| Pyrimidine                   | Fenarimol                                                                                 | 28-31 | P7 | 24/3074   | 1361/196100 | 1.19 (0.80-1.79) |
| Pyrimidine                   | Fenarimol                                                                                 | 32-36 | P8 | 136/22372 | 1381/196080 | 0.91 (0.76-1.08) |
| Pyrimidine                   | Pyrimethanil                                                                              | 32-36 | P8 | 44/22464  | 369/197092  | 1.05 (0.76-1.44) |
| Pyrimidinyl(thio)benzoate    | Pyrithiobac-sodium                                                                        | 28-31 | P7 | 5/3093    | 267/197194  | 1.02 (0.38-2.74) |
| Pyrimidinyl(thio)benzoate    | Pyrithiobac-sodium                                                                        | 32-36 | P8 | 19/22489  | 270/197191  | 0.64 (0.40-1.02) |
| Pyrolle                      | Fludioxonil                                                                               | 32-36 | P8 | 19/22489  | 110/197351  | 1.58 (0.97-2.58) |
| Quaternary Ammonium Compound | Alkyl (60%C14, 30%C16, 5%C12, 5%C18) dimethylbenzyl ammonium chloride                     | 32-36 | P8 | 8/22500   | 23/197438   | 2.79 (1.20-6.51) |
| Quaternary Ammonium Compound | Alkyl (68%C12, 32%C14) dimethylethylbenzyl ammonium chloride                              | 32-36 | P8 | 6/22502   | 17/197444   | 2.70 (0.99-7.32) |
| Quaternary Ammonium Compound | Dimethyl dicocoalkyl ammonium salt with naphthalenesulfonic acid, formaldehyde condensate | 32-36 | P8 | 7/22501   | 58/197403   | 1.18 (0.54-2.60) |
| Quaternary Ammonium          | Mepiquat chloride                                                                         | 24-27 | P6 | 12/1780   | 1452/196009 | 0.89 (0.49-1.61) |

|                              |                                                                   |       |    |           |             |                  |
|------------------------------|-------------------------------------------------------------------|-------|----|-----------|-------------|------------------|
| Compound                     |                                                                   |       |    |           |             |                  |
| Quaternary Ammonium Compound | Mepiquat chloride                                                 | 28-31 | P7 | 20/3078   | 1473/195988 | 0.90 (0.58-1.41) |
| Quaternary Ammonium Compound | Mepiquat chloride                                                 | 32-36 | P8 | 150/22358 | 1491/195970 | 0.88 (0.74-1.05) |
| Quinoline                    | Quinoxifen                                                        | 28-31 | P7 | 7/3091    | 439/197022  | 1.10 (0.52-2.34) |
| Quinoline                    | Quinoxifen                                                        | 32-36 | P8 | 61/22447  | 435/197026  | 1.23 (0.94-1.63) |
| Silicone                     | 2-(3-hydroxypropyl)-heptamethyl trisiloxane, ethoxylated, acetate | 28-31 | P7 | 6/3092    | 142/197319  | 2.45 (1.00-6.00) |
| Silicone                     | 2-(3-hydroxypropyl)-heptamethyl trisiloxane, ethoxylated, acetate | 32-36 | P8 | 17/22491  | 144/197317  | 1.10 (0.66-1.81) |
| Silicone                     | Compounded silicone                                               | 32-36 | P8 | 12/22496  | 179/197282  | 0.58 (0.32-1.07) |
| Silicone                     | Dimethyl silicone fluid emulsion                                  | 32-36 | P8 | 5/22503   | 90/197371   | 0.54 (0.22-1.33) |
| Silicone                     | Dimethylpolysiloxane                                              | 20-23 | P5 | 6/509     | 2301/195160 | 1.11 (0.50-2.50) |
| Silicone                     | Dimethylpolysiloxane                                              | 24-27 | P6 | 14/1778   | 2307/195154 | 0.73 (0.43-1.24) |
| Silicone                     | Dimethylpolysiloxane                                              | 28-31 | P7 | 32/3066   | 2257/195204 | 0.92 (0.64-1.32) |
| Silicone                     | Dimethylpolysiloxane                                              | 32-36 | P8 | 146/22362 | 2365/195096 | 0.55 (0.46-0.65) |
| Silicone                     | Heptamethyltrisiloxane ethoxylated                                | 32-36 | P8 | 10/22498  | 150/197311  | 0.65 (0.34-1.24) |
| Silicone                     | Methyl silicone resins                                            | 32-36 | P8 | 12/22496  | 208/197253  | 0.56 (0.31-1.00) |
| Silicone                     | Polyalkene oxide modified heptamethyl trisiloxane (code:03502)    | 20-23 | P5 | 5/510     | 705/196756  | 2.94 (1.21-7.12) |
| Silicone                     | Polyalkene oxide modified heptamethyl trisiloxane (code:03502)    | 24-27 | P6 | 7/1785    | 701/196760  | 1.00 (0.45-2.24) |
| Silicone                     | Polyalkene oxide modified heptamethyl trisiloxane (code:03502)    | 28-31 | P7 | 12/3086   | 678/196783  | 1.12 (0.62-2.04) |
| Silicone                     | Polyalkene oxide modified heptamethyl trisiloxane (code:03502)    | 32-36 | P8 | 49/22459  | 677/196784  | 0.63 (0.47-0.85) |
| Silicone                     | Polyalkene oxide modified heptamethyl trisiloxane (code:03841)    | 24-27 | P6 | 5/1787    | 591/196870  | 1.04 (0.43-2.51) |
| Silicone                     | Polyalkene oxide modified                                         | 32-36 | P8 | 47/22461  | 604/196857  | 0.70 (0.52-0.95) |

|                     |                                         |       |    |           |             |                  |
|---------------------|-----------------------------------------|-------|----|-----------|-------------|------------------|
|                     | heptamethyl trisiloxane<br>(code:03841) |       |    |           |             |                  |
| Silicone            | Silicone defoamer                       | 28-31 | P7 | 7/3091    | 702/196759  | 0.67 (0.32-1.41) |
| Silicone            | Silicone defoamer                       | 32-36 | P8 | 45/22463  | 678/196783  | 0.60 (0.44-0.82) |
| Spinosyn            | Spinetoram                              | 28-31 | P7 | 9/3089    | 568/196893  | 1.12 (0.58-2.16) |
| Spinosyn            | Spinetoram                              | 32-36 | P8 | 91/22417  | 541/196920  | 1.46 (1.16-1.84) |
| Spinosyn            | Spinosad                                | 20-23 | P5 | 8/507     | 3817/193644 | 0.85 (0.42-1.72) |
| Spinosyn            | Spinosad                                | 24-27 | P6 | 41/1751   | 3973/193488 | 1.13 (0.82-1.57) |
| Spinosyn            | Spinosad                                | 28-31 | P7 | 55/3043   | 3899/193562 | 0.97 (0.74-1.27) |
| Spinosyn            | Spinosad                                | 32-36 | P8 | 434/22074 | 3922/193539 | 0.99 (0.89-1.10) |
| Streptomycin        | Streptomycin sulfate                    | 32-36 | P8 | 32/22476  | 430/197031  | 0.67 (0.46-0.97) |
| Strobin             | Azoxystrobin                            | 20-23 | P5 | 7/508     | 2547/194914 | 1.20 (0.57-2.53) |
| Strobin             | Azoxystrobin                            | 24-27 | P6 | 16/1776   | 2457/195004 | 0.74 (0.44-1.23) |
| Strobin             | Azoxystrobin                            | 28-31 | P7 | 36/3062   | 2467/194994 | 1.01 (0.72-1.42) |
| Strobin             | Azoxystrobin                            | 32-36 | P8 | 211/22297 | 2426/195035 | 0.79 (0.68-0.91) |
| Strobin             | Kresoxim-methyl                         | 24-27 | P6 | 5/1787    | 486/196975  | 1.00 (0.37-2.69) |
| Strobin             | Kresoxim-methyl                         | 32-36 | P8 | 63/22445  | 490/196971  | 1.13 (0.86-1.48) |
| Strobin             | Pyraclostrobin                          | 24-27 | P6 | 25/1767   | 2792/194669 | 1.00 (0.66-1.51) |
| Strobin             | Pyraclostrobin                          | 28-31 | P7 | 34/3064   | 2790/194671 | 0.81 (0.57-1.15) |
| Strobin             | Pyraclostrobin                          | 32-36 | P8 | 303/22205 | 2855/194606 | 0.93 (0.82-1.05) |
| Strobin             | Trifloxystrobin                         | 24-27 | P6 | 8/1784    | 1476/195985 | 0.57 (0.27-1.20) |
| Strobin             | Trifloxystrobin                         | 28-31 | P7 | 27/3071   | 1490/195971 | 1.25 (0.85-1.83) |
| Strobin             | Trifloxystrobin                         | 32-36 | P8 | 165/22343 | 1427/196034 | 1.04 (0.88-1.23) |
| Substituted benzene | Chlorothalonil                          | 20-23 | P5 | 6/509     | 2120/195341 | 1.20 (0.53-2.68) |
| Substituted benzene | Chlorothalonil                          | 24-27 | P6 | 19/1773   | 2151/195310 | 1.05 (0.67-1.66) |
| Substituted benzene | Chlorothalonil                          | 28-31 | P7 | 26/3072   | 2108/195353 | 0.73 (0.48-1.12) |
| Substituted benzene | Chlorothalonil                          | 32-36 | P8 | 210/22298 | 2042/195419 | 0.91 (0.79-1.06) |
| Substituted benzene | Dicloran                                | 32-36 | P8 | 9/22499   | 136/197325  | 0.61 (0.31-1.20) |
| Sulfonylurea        | Halosulfuron-methyl                     | 28-31 | P7 | 5/3093    | 386/197075  | 0.93 (0.38-2.25) |
| Sulfonylurea        | Halosulfuron-methyl                     | 32-36 | P8 | 36/22472  | 403/197058  | 0.81 (0.57-1.14) |
| Sulfonylurea        | Mesosulfuron-methyl                     | 32-36 | P8 | 6/22502   | 44/197417   | 0.79 (0.28-2.21) |
| Sulfonylurea        | Nicosulfuron                            | 32-36 | P8 | 20/22488  | 319/197142  | 0.59 (0.37-0.92) |
| Sulfonylurea        | Rimsulfuron                             | 24-27 | P6 | 6/1786    | 857/196604  | 0.83 (0.37-1.86) |
| Sulfonylurea        | Rimsulfuron                             | 28-31 | P7 | 14/3084   | 762/196699  | 1.27 (0.75-2.16) |
| Sulfonylurea        | Rimsulfuron                             | 32-36 | P8 | 97/22411  | 755/196706  | 1.15 (0.93-1.43) |
| Tetrazine           | Clofentezine                            | 28-31 | P7 | 12/3086   | 772/196689  | 1.00 (0.55-1.81) |
| Tetrazine           | Clofentezine                            | 32-36 | P8 | 84/22424  | 736/196725  | 1.00 (0.80-1.26) |

|                                         |                       |       |    |           |             |                  |
|-----------------------------------------|-----------------------|-------|----|-----------|-------------|------------------|
| Thiocarbamate                           | Cycloate              | 28-31 | P7 | 10/3088   | 331/197130  | 2.08 (1.07-4.06) |
| Thiocarbamate                           | Cycloate              | 32-36 | P8 | 22/22486  | 315/197146  | 0.65 (0.41-1.01) |
| Thiocarbamate                           | Eptc                  | 32-36 | P8 | 26/22482  | 372/197089  | 0.64 (0.43-0.97) |
| Thiophanate,<br>benzimidazole precursor | Thiophanate           | 32-36 | P8 | 6/22502   | 53/197408   | 1.08 (0.46-2.52) |
| Thiophanate,<br>benzimidazole precursor | Thiophanate-methyl    | 28-31 | P7 | 5/3093    | 697/196764  | 0.52 (0.22-1.26) |
| Thiophanate,<br>benzimidazole precursor | Thiophanate-methyl    | 32-36 | P8 | 57/22451  | 737/196724  | 0.69 (0.52-0.91) |
| Thiophthalimide                         | Captan                | 28-31 | P7 | 12/3086   | 1257/196204 | 0.69 (0.39-1.22) |
| Thiophthalimide                         | Captan                | 32-36 | P8 | 100/22408 | 1201/196260 | 0.76 (0.62-0.94) |
| Thiophthalimide                         | Captan, other related | 28-31 | P7 | 12/3086   | 1257/196204 | 0.69 (0.39-1.22) |
| Thiophthalimide                         | Captan, other related | 32-36 | P8 | 100/22408 | 1201/196260 | 0.76 (0.62-0.94) |
| Triazine                                | Prometryn             | 28-31 | P7 | 9/3089    | 549/196912  | 1.14 (0.59-2.22) |
| Triazine                                | Prometryn             | 32-36 | P8 | 45/22463  | 533/196928  | 0.76 (0.55-1.04) |
| Triazine                                | Pymetrozine           | 28-31 | P7 | 5/3093    | 337/197124  | 1.05 (0.43-2.55) |
| Triazine                                | Pymetrozine           | 32-36 | P8 | 37/22471  | 295/197166  | 1.15 (0.82-1.62) |
| Triazine                                | Simazine              | 20-23 | P5 | 11/504    | 6066/191395 | 0.76 (0.42-1.38) |
| Triazine                                | Simazine              | 24-27 | P6 | 34/1758   | 5774/191687 | 0.67 (0.47-0.95) |
| Triazine                                | Simazine              | 28-31 | P7 | 73/3025   | 5913/191548 | 0.84 (0.67-1.07) |
| Triazine                                | Simazine              | 32-36 | P8 | 549/21959 | 5773/191688 | 0.86 (0.78-0.94) |
| Triazinone                              | Hexazinone            | 28-31 | P7 | 7/3091    | 610/196851  | 0.80 (0.38-1.68) |
| Triazinone                              | Hexazinone            | 32-36 | P8 | 71/22437  | 609/196852  | 1.06 (0.83-1.36) |
| Triazinone                              | Metribuzin            | 32-36 | P8 | 12/22496  | 151/197310  | 0.65 (0.35-1.20) |
| Triazolone                              | Carfentrazone-ethyl   | 24-27 | P6 | 23/1769   | 2295/195166 | 1.23 (0.81-1.86) |
| Triazolone                              | Carfentrazone-ethyl   | 28-31 | P7 | 29/3069   | 2272/195189 | 0.88 (0.61-1.29) |
| Triazolone                              | Carfentrazone-ethyl   | 32-36 | P8 | 235/22273 | 2213/195248 | 0.95 (0.82-1.09) |
| Triazolopyrimidine                      | Penoxsulam            | 32-36 | P8 | 11/22497  | 44/197417   | 2.41 (1.24-4.68) |
| Uracil                                  | Bromacil              | 28-31 | P7 | 6/3092    | 384/197077  | 1.06 (0.47-2.37) |
| Uracil                                  | Bromacil              | 32-36 | P8 | 39/22469  | 375/197086  | 0.92 (0.66-1.28) |
| Urea                                    | Diuron                | 20-23 | P5 | 8/507     | 4844/192617 | 0.67 (0.33-1.35) |
| Urea                                    | Diuron                | 24-27 | P6 | 30/1762   | 4809/192652 | 0.69 (0.48-1.01) |
| Urea                                    | Diuron                | 28-31 | P7 | 63/3035   | 4794/192667 | 0.91 (0.71-1.17) |
| Urea                                    | Diuron                | 32-36 | P8 | 463/22045 | 4701/192760 | 0.89 (0.80-0.98) |
| Urea                                    | Forchlorfenuron       | 32-36 | P8 | 6/22502   | 81/197380   | 0.45 (0.17-1.24) |
| Urea                                    | Linuron               | 28-31 | P7 | 7/3091    | 340/197121  | 1.08 (0.44-2.61) |
| Urea                                    | Linuron               | 32-36 | P8 | 38/22470  | 364/197097  | 0.86 (0.60-1.24) |
| Urea                                    | Thidiazuron           | 24-27 | P6 | 10/1782   | 932/196529  | 1.25 (0.67-2.33) |

|                |                                          |       |    |           |             |                  |
|----------------|------------------------------------------|-------|----|-----------|-------------|------------------|
| Urea           | Thidiazuron                              | 28-31 | P7 | 10/3088   | 990/196471  | 0.70 (0.38-1.31) |
| Urea           | Thidiazuron                              | 32-36 | P8 | 97/22411  | 1081/196380 | 0.82 (0.66-1.01) |
| Xylylalanine   | Mefenoxam                                | 24-27 | P6 | 10/1782   | 1500/195961 | 0.82 (0.44-1.52) |
| Xylylalanine   | Mefenoxam                                | 28-31 | P7 | 24/3074   | 1439/196022 | 1.02 (0.66-1.58) |
| Xylylalanine   | Mefenoxam                                | 32-36 | P8 | 139/22369 | 1433/196028 | 0.85 (0.71-1.02) |
| Xylylalanine   | Mefenoxam, other related                 | 24-27 | P6 | 9/1783    | 1103/196358 | 1.00 (0.52-1.94) |
| Xylylalanine   | Mefenoxam, other related                 | 28-31 | P7 | 17/3081   | 1043/196418 | 0.96 (0.57-1.63) |
| Xylylalanine   | Mefenoxam, other related                 | 32-36 | P8 | 92/22416  | 1010/196451 | 0.82 (0.66-1.02) |
| Xylylalanine   | Metalaxyl                                | 32-36 | P8 | 9/22499   | 199/197262  | 0.42 (0.22-0.82) |
| Zinc,inorganic | Zinc sulfate                             | 24-27 | P6 | 6/1786    | 955/196506  | 0.76 (0.34-1.69) |
| Zinc,inorganic | Zinc sulfate                             | 28-31 | P7 | 8/3090    | 944/196517  | 0.45 (0.20-1.01) |
| Zinc,inorganic | Zinc sulfate                             | 32-36 | P8 | 79/22429  | 938/196523  | 0.77 (0.61-0.97) |
| Unclassified   | Acequinocyl                              | 32-36 | P8 | 10/22498  | 128/197333  | 0.63 (0.32-1.25) |
| Unclassified   | Amino ethoxy vinyl glycine hydrochloride | 32-36 | P8 | 13/22495  | 93/197368   | 1.21 (0.66-2.21) |
| Unclassified   | Bifenazate                               | 24-27 | P6 | 7/1785    | 1227/196234 | 0.67 (0.32-1.40) |
| Unclassified   | Bifenazate                               | 28-31 | P7 | 15/3083   | 1271/196190 | 0.82 (0.49-1.36) |
| Unclassified   | Bifenazate                               | 32-36 | P8 | 155/22353 | 1212/196249 | 1.16 (0.98-1.37) |
| Unclassified   | Coconut diethanolamide                   | 32-36 | P8 | 7/22501   | 154/197307  | 0.42 (0.20-0.90) |
| Unclassified   | Cyclanilide                              | 32-36 | P8 | 17/22491  | 199/197262  | 0.80 (0.49-1.31) |
| Unclassified   | Cymoxanil                                | 32-36 | P8 | 21/22487  | 151/197310  | 1.22 (0.76-1.94) |
| Unclassified   | Daminozide                               | 32-36 | P8 | 11/22497  | 119/197342  | 0.62 (0.30-1.27) |
| Unclassified   | Ethofumesate                             | 32-36 | P8 | 6/22502   | 42/197419   | 1.20 (0.51-2.84) |
| Unclassified   | Etoxazole                                | 32-36 | P8 | 32/22476  | 316/197145  | 0.89 (0.61-1.30) |
| Unclassified   | Flonicamid                               | 24-27 | P6 | 5/1787    | 215/197246  | 2.79 (1.14-6.79) |
| Unclassified   | Flonicamid                               | 32-36 | P8 | 42/22466  | 237/197224  | 1.56 (1.11-2.18) |
| Unclassified   | Flumioxazin                              | 20-23 | P5 | 8/507     | 1225/196236 | 2.79 (1.38-5.63) |
| Unclassified   | Flumioxazin                              | 24-27 | P6 | 8/1784    | 1201/196260 | 0.70 (0.33-1.48) |
| Unclassified   | Flumioxazin                              | 28-31 | P7 | 17/3081   | 1236/196225 | 0.97 (0.60-1.56) |
| Unclassified   | Flumioxazin                              | 32-36 | P8 | 168/22340 | 1191/196270 | 1.26 (1.07-1.49) |
| Unclassified   | Fluopicolide                             | 32-36 | P8 | 6/22502   | 31/197430   | 1.66 (0.69-3.98) |
| Unclassified   | Fosetyl-al                               | 24-27 | P6 | 6/1786    | 538/196923  | 1.34 (0.60-3.01) |
| Unclassified   | Fosetyl-al                               | 28-31 | P7 | 7/3091    | 547/196914  | 0.77 (0.34-1.73) |
| Unclassified   | Fosetyl-al                               | 32-36 | P8 | 48/22460  | 548/196913  | 0.74 (0.55-1.01) |
| Unclassified   | Hexythiazox                              | 24-27 | P6 | 6/1786    | 767/196694  | 0.94 (0.42-2.11) |
| Unclassified   | Hexythiazox                              | 28-31 | P7 | 7/3091    | 775/196686  | 0.62 (0.29-1.31) |
| Unclassified   | Hexythiazox                              | 32-36 | P8 | 100/22408 | 783/196678  | 1.11 (0.89-1.37) |

|              |                                |       |    |           |             |                  |
|--------------|--------------------------------|-------|----|-----------|-------------|------------------|
| Unclassified | Indoxacarb                     | 24-27 | P6 | 12/1780   | 884/196577  | 1.58 (0.89-2.80) |
| Unclassified | Indoxacarb                     | 28-31 | P7 | 12/3086   | 925/196536  | 0.88 (0.49-1.55) |
| Unclassified | Indoxacarb                     | 32-36 | P8 | 108/22400 | 941/196520  | 1.03 (0.84-1.26) |
| Unclassified | Oxadiazon                      | 32-36 | P8 | 7/22501   | 91/197370   | 0.70 (0.32-1.51) |
| Unclassified | Propylene glycol, methyl ether | 24-27 | P6 | 6/1786    | 853/196608  | 0.70 (0.29-1.70) |
| Unclassified | Propylene glycol, methyl ether | 28-31 | P7 | 15/3083   | 903/196558  | 1.17 (0.70-1.96) |
| Unclassified | Propylene glycol, methyl ether | 32-36 | P8 | 52/22456  | 852/196609  | 0.53 (0.40-0.71) |
| Unclassified | Propargite                     | 20-23 | P5 | 5/510     | 3935/193526 | 0.53 (0.22-1.28) |
| Unclassified | Propargite                     | 24-27 | P6 | 18/1774   | 4054/193407 | 0.52 (0.33-0.83) |
| Unclassified | Propargite                     | 28-31 | P7 | 63/3035   | 4123/193338 | 1.05 (0.81-1.35) |
| Unclassified | Propargite                     | 32-36 | P8 | 352/22156 | 4212/193249 | 0.75 (0.67-0.84) |
| Unclassified | Pyridaben                      | 32-36 | P8 | 36/22472  | 421/197040  | 0.70 (0.49-1.00) |
| Unclassified | Triforine                      | 32-36 | P8 | 7/22501   | 48/197413   | 1.17 (0.50-2.73) |

<sup>1</sup>Odds ratio adjusted for maternal age (years), race/ethnicity (non-Hispanic white, U.S.-born Hispanic, foreign-born Hispanic, other), education (less than high school, high school, more than high school), parity (1 or  $\geq 2$ ), prenatal care initiated by fifth month (yes vs no), payer source for care (Medi-Cal, private, or other).
